# Supplementary material for: A New Structural Model of Apolipoprotein B100 Based on Computational Modeling and Cross Linking
Source: MDPI journal article supplement (doi:10.3390/ijms231911480), 2022-09-29
Supplement: s1 [file s1]

| ID  | Probability | P-value | Location  | Sequence                               |
|-----|-------------|---------|-----------|----------------------------------------|
| A1  | 84.62       | 1.1e-06 | 1528-1551 | ---QGTNQITGRYEDGTLSTSTSDLQ-s.....      |
| A2  | 83.14       | 1.7e-07 | 1553-1578 | --GIKNTASLKYENYELTKSDTNGKY.....        |
| A3  | 78.53       | 5.4e-05 | 1579-1606 | KNFATSNKMDMTFSKQNALLRSEYQADY.....      |
| A4  | 75.93       | 5.0e-04 | 1607-1634 | ESLRFSSLSGSLNSHGLELNADILGTD.....       |
| A5  | 81.46       | 8.0e-06 | 1635-1662 | KINSGAHKATLRIGQDGISTSATTLNKC.....      |
| A6  | 81.94       | 1.4e-06 | 1663-1690 | SLLVLENELNAELGLSGASMKLTTNGRF.....      |
| A7  | 76.18       | 3.6e-05 | 1691-1718 | REHNAKFSLDGKAALTELSLGSAYQAMI.....      |
| A8  | 81.28       | 4.5e-06 | 1719-1746 | LGVDSKNIFNFKVSQEGKLSDMMGSY.....        |
| A9  | 79.05       | 8.0e-05 | 1747-1774 | AEMKFDHTNSLNIAGLSLDFSSKLDNIYss.....    |
| A10 | 76.64       | 1.1e-04 | 1777-1803 | -DKFYKQTVNLQLQPYSLVTTLNSDLKY.....      |
| A11 | 79.40       | 1.9e-06 | 1804-1831 | NALDLTNGKLRLEPLKLHVAGNLKGAY.....       |
| A12 | 82.87       | 6.9e-07 | 1832-1859 | QNNIEKHIYAISAAALSASYKADTVAKV.....      |
| A13 | 80.53       | 6.1e-06 | 1860-1887 | QGVFESHRLNTDIAGLASAIDMSTNYS.....       |
| A14 | 80.99       | 4.3e-05 | 1888-1915 | DSLHFSNVFRSVMAPFTMTIDAHTNGNGklalwgehtg |
| A15 | 73.06       | 1.1e-04 | 1926-1944 | ---QLYSKFLKAEPLAFTFSH-----.....        |

No. of repeats:15 P-value: 3.8E-14 Length:28

**Figure S1.** Subunit II domain 1 sequence repeats analysis. Fifteen rows show the structure aligned sequences of the repeats and are preceded by the residue numbers. MPI Bioinformatics toolkit HHrepID was used for sequence analysis (<https://toolkit.tuebingen.mpg.de/tools/hhrepid>).

| ID | Location  | Probability                                                                        | P-value  |
|----|-----------|------------------------------------------------------------------------------------|----------|
| A1 | 2610-3126 | 100.00                                                                             | 1.9e-140 |
| A2 | 3127-3673 | 100.00                                                                             | 3.3e-173 |
| A3 | 3675-4059 | 100.00                                                                             | 2.9e-87  |
| A1 | 2610-3126 | -----                                                                              |          |
| A2 | 3127-3673 | NIPLTIPEMRLPYTIITTPPLKDFSLWEKTGLKEFLK.TTKQSFDSL SVKAQYKKNKHRHSITNPLAVLCEFIQSISKSFD |          |
| A3 | 3675-4059 | -----IILP-VYDKSLWDFLKLDTTTSiGRRQHLRVSTAFVYTKNPNGYSF SIPVKVLADKFII--PG--            |          |
| A1 | 2610-3126 | -----ATFQTPDFIVPLTDLRIPSVQINFKDLKniKIPSRFSTPEFT                                    |          |
| A2 | 3127-3673 | RHFENRRNNALDFVTKSYNETKIKFDKYKAEKSHDELPRTFQIPGYTPVVNVEVSPFTIEMSAFGY.VFPKAVSMPSFS    |          |
| A3 | 3675-4059 | -----LKLNDLNSVLVMPTFHVPFTDLQVPSCKLDFREI--.QIYKKLRTSSFA                             |          |
| A1 | 2610-3126 | I.....LN-TFHIPSFTIdfvmkvkiirtidqmlnselqwpvpdiylrdlkvediPL                          |          |
| A2 | 3127-3673 | I.....LGSDVRVPSYTL.....IL                                                          |          |
| A3 | 3675-4059 | LnlpplpevkfpevdvltkysqpedslIPFFEITVPESQL.....TV                                    |          |
| A1 | 2610-3126 | ARI.....TLPDFrlpeiaipeFIIPTLnIndfqvPDLHIPEFQLPHISHTIEVPTFGKL                       |          |
| A2 | 3127-3673 | PSL.....ELPV.....LHVPRN.....LKLSPDFKELCTISHIFIPAMGNI                               |          |
| A3 | 3675-4059 | SQFtlpkvsdgiaaldlnavankiadfELPT.....IIVPEQ.....-TIEIPSIKF-SVPAGIVIPSFQAL           |          |
| A1 | 2610-3126 | YSILKIQSPLFTLDANADIGNGttsaneAG.IAASITAKGESKLEVLNFDQANAQLSNPKinP.LALKESVKFSSKYLR    |          |
| A2 | 3127-3673 | TYDFSFKSSVITLNTNAELFNQ.....SD.IVAHLLSSSSVIDALQYKLEGTTRLTRKR..G.LKLATALSLSNKFVE     |          |
| A3 | 3675-4059 | TARFEVDSPVYNATWSASLKNK.....AdyVETVL DSTCSSTVQFLEYELNVLGTHKIED..GtLASKTKGTFahrDFS   |          |
| A1 | 2610-3126 | TEHGSEMLFFGNAIEGKSNTVASLHTEKNTLELSNGVIVKINNQLTDSNTKYFHKLNI PKLDFSSQADLRNEIKTL LKA  |          |
| A2 | 3127-3673 | GSHNSTVSLTTKNMEVSVATTTKAQIPILRMNFQELNGNTKSKPTVSSSMEFKYDFNSSMLYSTAKGAVDHKLSLES LT   |          |
| A3 | 3675-4059 | AEYEEDGKYEG LQ-----EWEGKAHLNIKSPAF---TDLHLRYQDKKG--                                |          |
| A1 | 2610-3126 | GHIAWTSSGKGSWKWAC.....-PRFSDEGTHESQISFTIEGPLT.SFGLSNKINS---KHLRVNQNLVYESGSLN-F     |          |
| A2 | 3127-3673 | SYFSIESSTKGDVKGSV.....LSREYSGTIASEANTYLSKSTRS.SVKLQGT SKIDDIWNLEVKENFAGEATLQRIY    |          |
| A3 | 3675-4059 | ISTSAASPAVGTVGMDMdedddFSKwNFYSPQSSPDKKLTI FKTELrVRESDEETQIKVNWE-----               |          |
| A1 | 2610-3126 | SKLEIQSQVDSQHVghsvltakgmalfgegkaeftgrhdaH1NGKVIGTLKNSLFFSAQPFEItastNNEGNLKVRFPLR   |          |
| A2 | 3127-3673 | SLWEHSTKNHLQLE.....G.LFFTNGEHTSKATLELSPWQM....SALVQVHASQPSS                        |          |
| A3 | 3675-4059 | -----                                                                              |          |
| A1 | 2610-3126 | LTGKIDFLNNYALFLSPAQQASWQVSARFNQYKYNQNF SAGNNENIMEAHVGINGEANLDFL-.                  |          |
| A2 | 3127-3673 | FHDfPDLGQEVALNANTKNQKIRWKNEVRIHSGSFQSQVELSNDQEKAHLDIAGSLEGHLRFLKn                  |          |
| A3 | 3675-4059 | -----                                                                              |          |

No. of repeats:3 P-value:3.3E-228 Length:527

**Figure S2.** Subunit IV (residues A2610-E4059) sequence repeats analysis. MPI Bioinformatics toolkit HHrepID was used for sequence analysis (<https://toolkit.tuebingen.mpg.de/tools/hhrepid>).

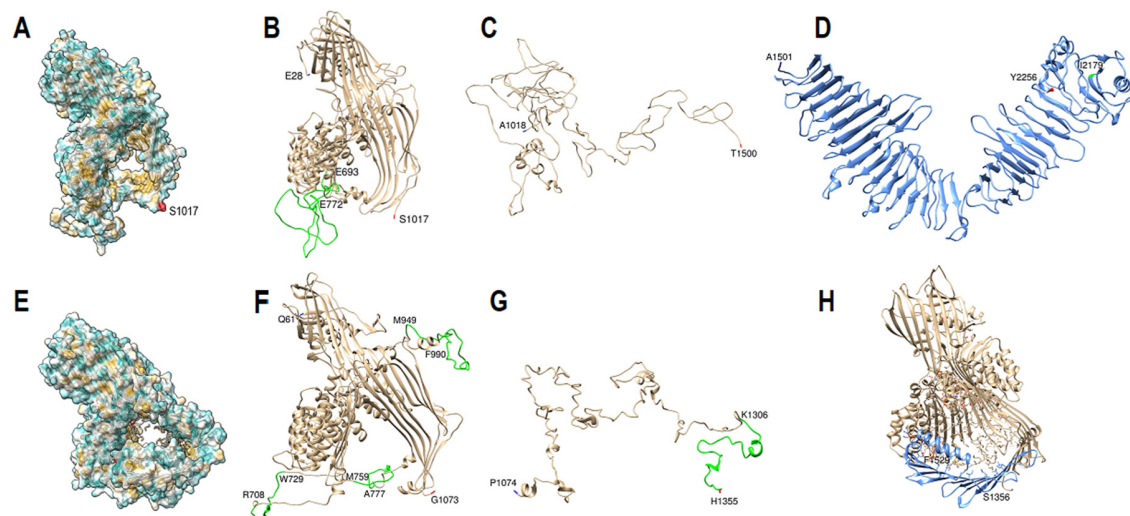

**Figure S3.** Human apoB and lamprey lipovitellin/vitellogenin secondary and tertiary structure comparison. (A) Surface representation of apoB residues E28-S1017 with the most hydrophobic (dark cyan) to white to least hydrophobic (dark goldenrod). S1017 in red indicates the C-terminal of subunit I. (B) Ribbon representation of apoB subunit I, which shows a large coil segment from E693-E772 in green. (C) ApoB subunit II coil, residues A1018-T1500. (D) ApoB subunit II domain 1 extended to subunit III domain 1, residues A1501-Y2256. Residue I2179 (green) indicates the C-terminal of apoB-48. (E) Surface representation of lipovitellin crystal structure with lipid molecules inside the cavity. (F) In a computational model of lipovitellin residues Q61-G1073, the three coils in green show the gaps in the crystal structure. (G) A computational model of vitellogenin residues P1074-H1355. Tan coil represents part of the vitellogenin sequence that is proteolytically cleaved, and the coil in green lacks electron density in X-ray crystallography. (H) Ribbon representation of lipovitellin crystal structure. (H) Ribbon representation of lipovitellin crystal structure with lipid molecules inside the cavity. The  $\beta$ -sheet in blue (S1356-F1529) that covers the base of the lipovitellin cavity is mainly made from  $\beta$ -strands and comparable to  $\beta$ -strands that form subunit II domain 1 in apoB. UCSF Chimera and ChimeraX were used for molecular graphics and analysis <sup>1</sup>(<https://www.rbvi.ucsf.edu/chimerax>).

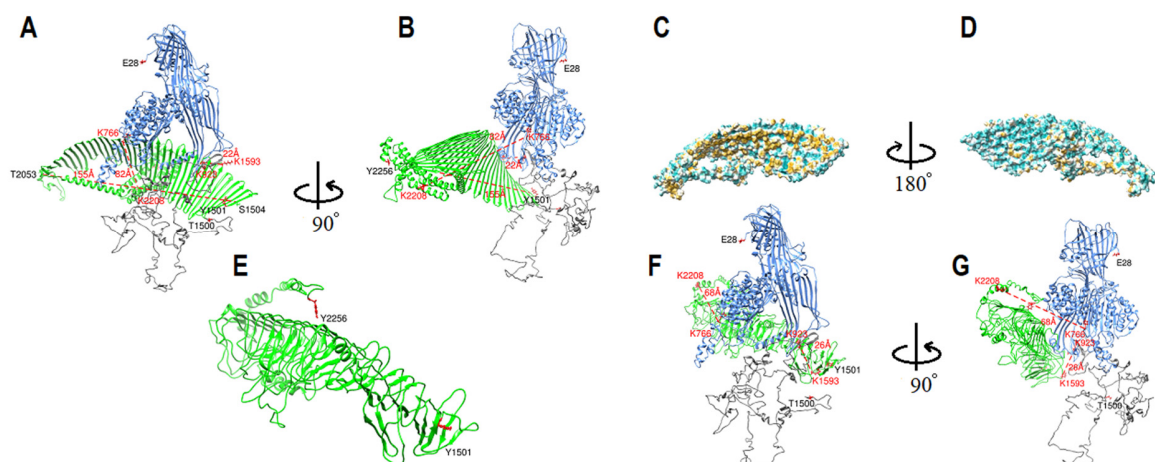

**Figure S4.** Human apoB-100 segment one (E28-T1500) and alternative segment two (Y1501-Y2256) match test by applying cross-links C (K766-K2208) and E (K923-K1593). (A-B) Ribbon representation of segments one and two indicate that the structure from Y1501-T2053 is folding in a  $\beta$ -sheet form and the distance between two residues is 155 Å. (C, D) Surface representation of segment two. The  $\beta$ -sheet was hydrophobic on one side (dark goldenrod) and hydrophilic (dark cyan) on the opposite side, but we were not able to orient the two segments according to the two cross-links. The distance between K766-K2208 was  $>26$  Å ( $\sim 82$  Å). (E) Segment two's second model was a  $\beta$ -helix with a prism folding. (F, G) This model did not match segment one, and the distance between K766-K2208 was  $>26$  Å ( $\sim 68$  Å). RoseTTAFold was used to generate the  $\beta$ -sheet model, and the  $\beta$ -helix model was made by I-TASSER <sup>2-4</sup>.

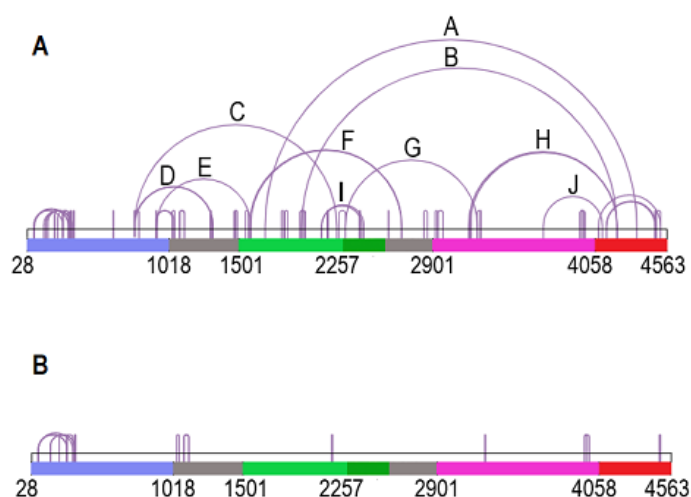

**Figure S5.** Comparison of DSSO cross-link maps on LDL versus VLDL. (A) DSSO cross-link map of linear apoB-100 sequence in LDL with inter-subunit cross-links are labeled from A-J. (B) DSSO cross-link map of VLDL lacks the inter-subunit and most of the short distance intra-subunit cross-links.

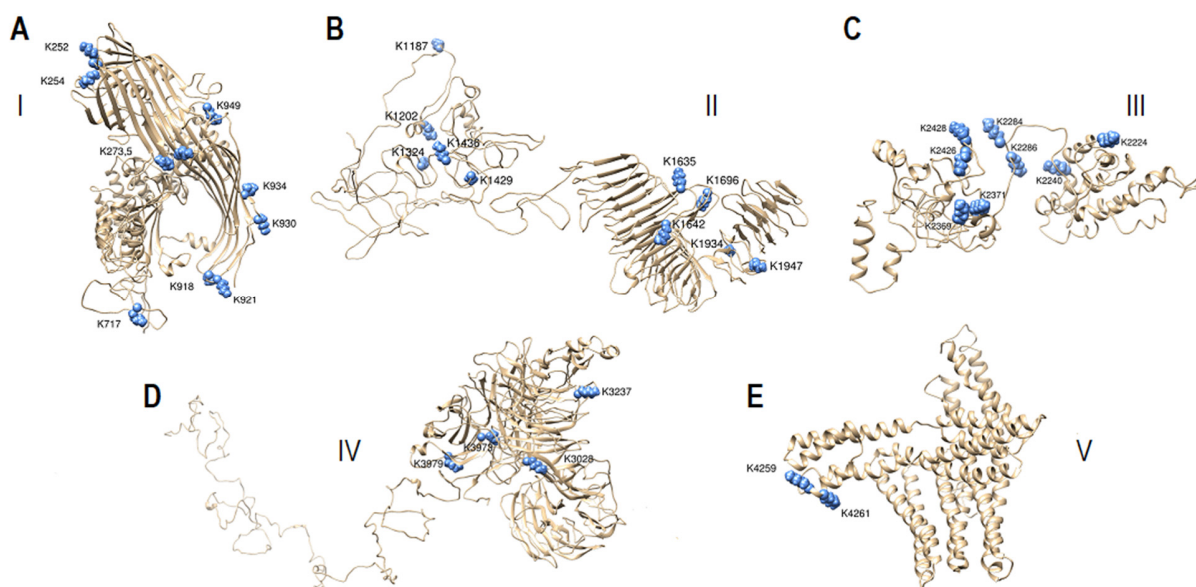

**Figure S6.** ApoB-100 structure with hydrolyzed DSSO cross-links. (A-E) Ribbon representation of apoB-100 five subunits with lysin spherical representation in blue indicates the location of hydrolyzed DSSO cross-links in LDL that determine hydrophilic areas.

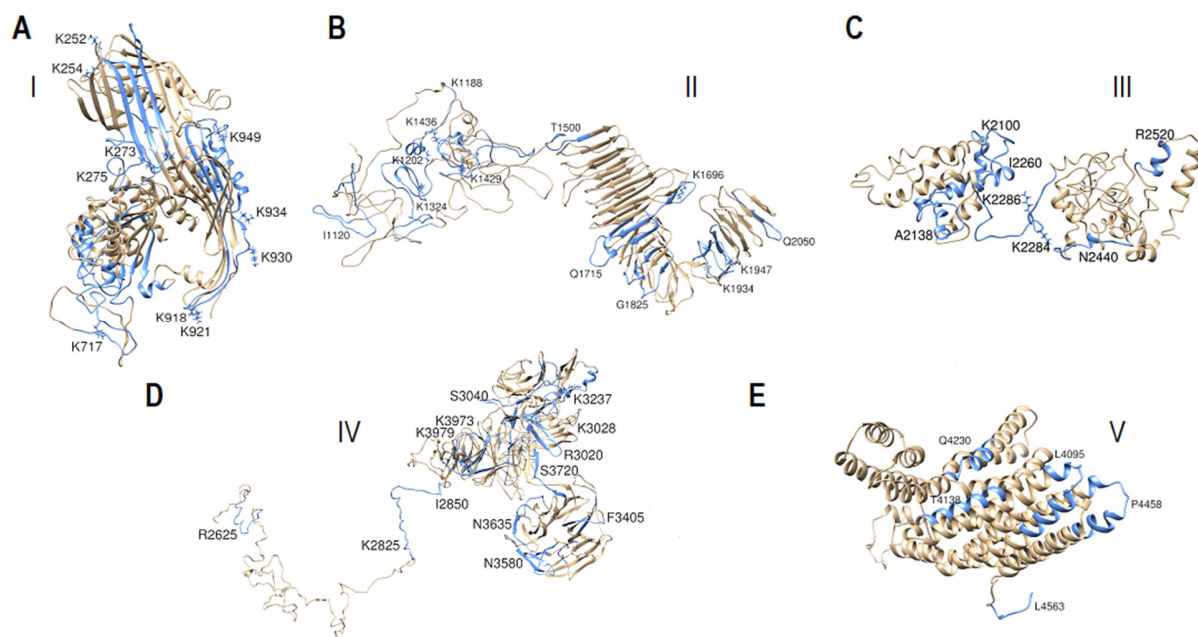

**Figure S7.** Painted ApoB-100 structure. (A-E) Ribbon representation of apoB-100 five subunits with painted regions in blue to determine hydrophilic areas. Lysin ball and stick representation in blue indicates the location of lysin residues those where painted and hydrolyzed. Most hydrolyzed DSSO cross-links (Fig. S6) are within the painted parts.



**Table. S1.** Human apoB-100 DSSO cross-links identified by nLC-MS/MS

| Number | Peptide Sequence A           | Position A | Peptide Sequence B        | Position B | Distance (Ca-Ca) Å |
|--------|------------------------------|------------|---------------------------|------------|--------------------|
| 1      | [K]YTYNYEAESSSGVPGTADSR      | 51         | LEDTP[K]INSR              | 293        | 6.3                |
| 2      | YEL[K]LAIEPGK                | 132        | [K]MGLAFESTK              | 305        | 8.5                |
| 3      | YEL[K]LAIEPGK                | 132        | FFGEGT[K]K                | 304        | 10.4               |
| 4      | QVFLYPE[K]DEPTYILNIKR        | 147        | FFGEGT[K]K                | 304        | 6.5                |
| 5      | [K]GNVATEISTER               | 196        | [K]HVAEAICKEQHFLPFSYK     | 254        | 16.1               |
| 6      | GMTRPLSTLISSSQSCQYTLDA[K]R   | 252        | LEDTP[K]INSR              | 293        | 16                 |
| 7      | GMTRPLSTLISSSQSCQYTLDA[K]RK  | 252        | [K]GNVATEISTER            | 196        | 16.1               |
| 8      | GMTRPLSTLISSSQSCQYTLDA[K]R   | 252        | F[K]HLR                   | 47         | 10.2               |
| 9      | YGMVAQVTQTLKLEDTP[K]INSR     | 293        | F[K]HLRK                  | 47         | 9.2                |
| 10     | MGLAFEST[K]STSPPK            | 314        | F[K]PIR                   | 216        | 15.7               |
| 11     | MGLAFEST[K]STSPPK            | 314        | FFGEGT[K]K                | 304        | 19.7               |
| 12     | STSPP[K]QAEAVLK              | 320        | T[K]NSEEFAAAMSR           | 117        | 14.9               |
| 13     | STSPPKQAEAVL[K]TLQELK        | 327        | [K]LTISEQNIQR             | 334        | 11.1               |
| 14     | NFVASHIANILNSEEIDQL[K]K      | 612        | LV[K]EALKESQLPTVMDFR      | 616        | 6.1                |
| 15     | S[K]EVPEAR                   | 768        | LI[K]DLK                  | 763        | 11.6               |
| 16     | ILGEELGFASLHDLQLLG[K]LLLMGAR | 797        | LI[K]DLKSK                | 763        | 23.7               |
| 17     | ILGEELGFASLHDLQLLG[K]LLLMGAR | 797        | LIKDL[K]SK                | 766        | 21.4               |
| 18     | SGVQMNTNFFHESGLEAHVAL[K]AGK  | 918        | L[K]FIIPSPK               | 923        | 9.5                |
| 19     | ALVDTL[K]FVTQAEGAK           | 1034       | QTEATMTF[K]YNR            | 1052       | 21.4               |
| 20     | ALVDTL[K]FVTQAEGAK           | 1034       | L[K]FIIPSPK               | 923        | 4.3                |
| 21     | FVTQAEGA[K]QTEATMTFK         | 1043       | AG[K]LK                   | 921        | 10.9               |
| 22     | VNDESTEG[K]TSYR              | 1087       | [K]IKGVISIPR              | 1119       | 22.1               |
| 23     | VNDESTEG[K]TSYR              | 1087       | KI[K]GVISIPR              | 1121       | 16.4               |
| 24     | IEIPLPFGG[K]SSR              | 1305       | DL[K]MLETVR               | 1311       | 14.3               |
| 25     | TPALHF[K]SVGFHLPSR           | 1324       | LI[K]DLK                  | 763        | 37.3               |
| 26     | TPALHF[K]SVGFHLPSR           | 1324       | DL[K]SK                   | 766        | 42.5               |
| 27     | EV[K]IDGQFR                  | 1485       | K[K]QHLFVK                | 1476       | 24.7               |
| 28     | VSSFYA[K]GTYGLSCQRDPNTGR     | 1498       | EV[K]IDGQFR               | 1485       | 25.6               |
| 29     | YEDGTLSTSTSDLQSGII[K]NTASLK  | 1556       | SDTNG[K]YK                | 1577       | 14.6               |
| 30     | NFATSN[K]MDMTFSKQNALLR       | 1586       | V[K]IIR                   | 2671       | 20.7               |
| 31     | YKNFATSNKMDMTFS[K]QNALLR     | 1593       | L[K]FIIPSPK               | 923        | 22.8               |
| 32     | NFATSNKMDMTFS[K]QNALLR       | 1593       | V[K]IIR                   | 2671       | 18.6               |
| 33     | FREHNA[K]FSLDGK              | 1696       | LL[K]ENLCLNLHK            | 4349       | 22.7               |
| 34     | LHVAGNL[K]GAYQNNEIK          | 1828       | YNALDLTNNG[K]LR           | 1813       | 22.8               |
| 35     | GAYQNNEI[K]HIYAISAAALSASYK   | 1837       | ADTVA[K]VQGVESHHR         | 1858       | 8.2                |
| 36     | AEPLAFTFSHDY[K]GSTSHHLVSR    | 1947       | VSALLTPAEQTGTW[K]LK       | 1982       | 23.3               |
| 37     | AEPLAFTFSHDY[K]GSTSHHLVSR    | 1947       | L[K]JTQFNNNEYSQDLDAYNTK   | 1984       | 21.4               |
| 38     | SISAALEH[K]VSALLTPAEQTGTWK   | 1967       | AEPLAFTFSHDY[K]GSTSHHLVSR | 1947       | 16.1               |

|    |                                    |      |                     |      |      |
|----|------------------------------------|------|---------------------|------|------|
| 39 | NL[K]HINIDQFVR                     | 2100 | LVGFIDDAV[K]K       | 2402 | 33.9 |
| 40 | NL[K]HINIDQFVR                     | 2100 | I[K]DYFEK           | 2387 | 36.3 |
| 41 | QVSHA[K]EK                         | 2139 | LTALT[K]K           | 2147 | 14.8 |
| 42 | IAIANIIDEIIE[K]LK                  | 2208 | LIKDL[K]SK          | 766  | 22.9 |
| 43 | VNLV[K]TIHDLHLFIENIDFNK            | 2224 | LQQL[K]R            | 2270 | 18.4 |
| 44 | ETIQ[K]LSNVLQQVK                   | 2376 | LVELAHQY[K]LK       | 2369 | 9.7  |
| 45 | NLTDFAEQYSIQDWA[K]R                | 2575 | M[K]ALVEQGFTVPEIK   | 2578 | N/A  |
| 46 | TEHGSEMLFFGNAIEG[K]SNTVASLHTE<br>K | 2853 | ESV[K]FSSK          | 2829 | 28   |
| 47 | AGHIAWTSSG[K]GSWK                  | 2926 | NEI[K]TLLK          | 2911 | 34.2 |
| 48 | GSW[K]WACPR                        | 2930 | INS[K]HLR           | 2966 | 17.1 |
| 49 | LPYTIITTPPL[K]DFSLWEK              | 3148 | FQFPG[K]PGIYTR      | 4207 | 18.5 |
| 50 | LPYTIITTPPLKDFSLWEKTGL[K]EFLK      | 3159 | FQFPG[K]PGIYTR      | 4207 | 19.2 |
| 51 | TT[K]QSFDLSVK                      | 3166 | TGL[K]EFLK          | 3159 | 10.9 |
| 52 | SFDRHFE[K]NR                       | 3210 | LQQL[K]R            | 2270 | 19.8 |
| 53 | I[K]FDKYK                          | 3229 | YKAE[K]SHDELPR      | 3237 | 22.8 |
| 54 | IKFD[K]YK                          | 3232 | AE[K]SHDELPR        | 3237 | 13   |
| 55 | AE[K]SHDELPR                       | 3237 | HFE[K]NR            | 3210 | 25.1 |
| 56 | NIILPVYD[K]SLWDFLK                 | 3682 | EVSS[K]LR           | 4103 | 25.1 |
| 57 | DFSAEYEEDG[K]YEGLQEWEGKAHLNI<br>K  | 3963 | T[K]GTFAHR          | 3946 | 11.1 |
| 58 | DFSAEYEEDGKYEGLQEWEG[K]AHLNI<br>K  | 3973 | T[K]GTFAHR          | 3946 | 26.9 |
| 59 | AHLNI[K]SPAFTDLHLR                 | 3979 | T[K]GTFAHR          | 3946 | 12   |
| 60 | DNVP[K]ATGVLYDYVVK                 | 4076 | FIAES[K]R           | 4518 | 17.2 |
| 61 | FQ[K]AASGTTGTQEWKDK                | 4132 | SQAIAT[K]K          | 4485 | 18.2 |
| 62 | FQFPG[K]PGIYTR                     | 4207 | [K]SISAALEHK        | 1958 | 21.1 |
| 63 | IAELSATAQEII[K]SQAIATK             | 4478 | [K]IISDYHQQFR       | 4486 | 12.3 |
| 64 | IAELSATAQEII[K]SQAIATKK            | 4478 | FQ[K]AASGTTGTQEWKDK | 4132 | 24.8 |
| 65 | SQAIAT[K]K                         | 4485 | FIAES[K]R           | 4518 | 28   |

A total number of 65 unique cross-links were identified by mass spectrometry. The distance between C $\alpha$ -C $\alpha$  of lysine residues was measured except for cross-link n:45, which was located at the beginning of the subunit IV gap. 56 cross-links were within the 26 Å threshold, and 8 cross-links were beyond the 26 Å limit (red). At least one lysine residue of cross-links n:25, n:26, and n:46 was located within the coil region.



## References

- (1) Pettersen, E. F.; Goddard, T. D.; Huang, C. C.; Couch, G. S.; Greenblatt, D. M.; Meng, E. C.; Ferrin, T. E. UCSF Chimera—A Visualization System for Exploratory Research and Analysis. *J Comput Chem* 2004, 25 (13), 1605–1612. <https://doi.org/10.1002/jcc.20084>.
- (2) Zhang, C.; Freddolino, P. L.; Zhang, Y. COFACTOR: Improved Protein Function Prediction by Combining Structure, Sequence and Protein–Protein Interaction Information. *Nucleic Acids Res* 2017, 45 (Web Server issue), W291–W299. <https://doi.org/10.1093/nar/gkx366>.
- (3) Yang, J.; Zhang, Y. I-TASSER Server: New Development for Protein Structure and Function Predictions. *Nucleic Acids Res* 2015, 43 (W1), W174–W181. <https://doi.org/10.1093/nar/gkv342>.
- (4) Baek, M.; DiMaio, F.; Anishchenko, I.; Dauparas, J.; Ovchinnikov, S.; Lee, G.; Wang, J.; Cong, Q.; Kinch, L. N.; Schaeffer, D. R.; Millán, C.; Park, H.; Adams, C.; Glassman, C. R.; DeGiovanni, A.; Pereira, J. H.; Rodrigues, A. V.; Dijk, A. A. van; Ebrecht, A. C.; Opperman, D. J.; Sagmeister, T.; Buhlheller, C.; Pavkov-Keller, T.; Rathinaswamy, M. K.; Dalwadi, U.; Yip, C. K.; Burke, J. E.; Garcia, C. K.; Grishin, N. V.; Adams, P. D.; Read, R. J.; Baker, D. Accurate Prediction of Protein Structures and Interactions Using a Three-Track Neural Network. *Science* 2021, eabj8754. <https://doi.org/10.1126/science.abj8754>.
